# Supplementary material for: Epidemiology of paediatric pain-related visits to emergency departments in the USA: a cross-sectional study
Source: PubMed Central journal article supplement — BMJ Open. 2021 Aug 16;11(8):e046497. doi: 10.1136/bmjopen-2020-046497 (PMC8370556; doi:10.1136/bmjopen-2020-046497), 2021-08-16
Supplement: bmjopen-2020-046497supp001.pdf [file bmjopen-2020-046497supp001.pdf]

## Data Supplement S1

Pain-related ED visits included any visit with a Reason for Visit code that was “definitely painful” or “probably painful”.

Pain-related ED visits with painful chief complaint included any visit in which the first Reason for Visit code (first line of RFV) was categorized as “definitely painful”.

### *Definitely painful Reason for Visit codes (SYMPTOMS)*

- **1050.0** Chest pain and related symptoms
  - 1050.1 Chest pain, soreness (excludes: heart pain, 1265.0)
  - 1050.2 Chest discomfort, pressure, tightness, heaviness (includes C – pressure)
  - 1050.3 Burning sensation in the chest
- **1055.0** Pain, specified site not referable to a specific body system (includes: Buttock pain, Gluteal pain, Perineal pain; excludes: abdominal pain [1545.1-1545.3], chest pain [1050.1], phantom leg/limb [2307.0])
  - 1055.1 Rib pain
  - 1055.2 Side pain, flank pain
  - 1055.3 Groin pain (includes: Pubic pain)
  - 1055.4 Facial pain (includes: Jaw pain, Pain over eye)
- **1060.0** Pain and related symptoms, NEC
  - 1060.1 Pain, unspecified (includes: Ache all over [generalized], Incisions [postopcode 4205.0 also])
  - 1060.2 Cramps, spasms, site unspecified (excludes: Menstrual cramps [1745.2])
  - 1060.3 Stiffness, site unspecified
- **1355.0** Earache, or ear infection
  - 1355.1 Earache, pain
  - 1355.2 Ear infection
- **1545.0** Stomach and abdominal pain, cramps and spasms (includes: gastric pain; excludes: groin pain [1055.3])
  - 1545.1 Abdominal pain, cramps, spasms, NOS (includes: Abdominal discomfort, NO, Gas pains, intestinal colic)
  - 1545.2 Lower abdominal pain, cramps, spasms (includes: Right lower quadrant [RLQ] pain, Left lower quadrant [LLQ] pain, inguinal pain)
  - 1545.3 Upper abdominal pain, cramps, spasms (includes: Epigastric pain, Left upper quadrant (LUQ) pain, Pain in umbilical region, Right upper quadrant (RUQ) pain).
- **1210.0** Headache, pain in head (includes: Post-traumatic [also code 5575.0]; excludes: migraine [2365.0], sinus headache [1410.1], symptoms of head, NEC [1207.0])
- **1265.0** Heart pain (includes: Anginal pain, heart distress, pain over heart; excludes: angina pectoris [2515.0], chest pain [1050.1])
- **1320.1** Eye pain (includes: irritation)
- **1320.3** Eye burning, stinging
- **1410.1** Sinus pain and pressure (includes: Sinus headache)
- **1455.1** Soreness (Includes: Throat hurts)
- **1455.2** Pain (burning, throat on fire)

- **1485.1** Lung pain
- **1500.1** Toothache
- **1500.2** Gum pain
- **1510.1** Pain, burning, soreness (1510.0 is symptoms referable to mouth)
- **1515.1** Pain (1515.0 is symptoms referable to tongue)
- **1605.1** Pain (includes: burning, irritation) (1605.0 is symptoms referable to anus-rectum)
- **1610.1** Pain (1610.0 is symptoms of liver, gallbladder, and biliary tract)
- **1650.0** Painful urination (includes: Burning, discomfort)
- **1665.1** Pain (1665.0 is symptoms of bladder)
- **1670.1** Pain (1670.0 is symptoms of the kidneys)
- **1700.1** Pain, aching, soreness, tenderness, painful erection (1700.0 is symptoms of penis)
- **1715.1** Pain, aching, tenderness (1715.0 is symptoms of the scrotum and testes)
- **1745.2** Painful menstruation (dysmenorrhea) (includes: Menstrual cramps, pain in legs and back during menstruation) (1745.0 is menstrual symptoms, other and unspecified)
- **1765.1** Pain (1765.0 is other vaginal symptoms)
- **1775.1** Pain (1775.0 is pelvic symptoms)
- **1790.1** Pain during pregnancy
- **1800.0** Pain or soreness of breast (includes: Tenderness)
- **1870.1** Pain (1870.0 is skin irritations, NEC)
- **1900.1** Neck symptoms (includes: pain, ache, soreness, discomfort)
- **1905.1** Back symptoms (includes: pain, ache, soreness, discomfort)
- **1910.1** Low back symptoms (includes: pain, ache, soreness, discomfort)
- **1915.1** Hip symptoms (includes: pain, ache, soreness, discomfort)
- **1920.1** Leg symptoms (includes: pain, ache, soreness, discomfort)
- **1925.1** Knee symptoms (includes: pain, ache, soreness, discomfort)
- **1930.1** Ankle symptoms (includes: pain, ache, soreness, discomfort)
- **1935.1** Foot and toe symptoms (includes: pain, ache, soreness, discomfort)
- **1940.1** Shoulder symptoms (includes: pain, ache, soreness, discomfort)
- **1945.1** Arm symptoms (includes: pain, ache, soreness, discomfort)
- **1950.1** Elbow symptoms (includes: pain, ache, soreness, discomfort)
- **1955.1** Wrist symptoms (includes: pain, ache, soreness, discomfort)
- **1960.1** Hand and finger symptoms (includes: pain, ache, soreness, discomfort)
- **1965.1** Symptoms of unspecified muscles (includes: pain, ache, soreness, discomfort)
- **1970.1** Symptoms of unspecified joints (includes: pain, ache, soreness, discomfort)
- **1975.1** Bowlegged, knock-kneed (1975.0 is Musculoskeletal deformities)
- **1980.1** Other musculoskeletal symptoms (includes: bone pain, stump pain)

*Definitely painful Reason for Visit codes (CONDITIONS)*

- **2010.0** Streptococcal infection (includes: Streptococcal tonsillitis, Scarlet fever)
- **2365.0** Migraine headache
- **2655.0** Appendicitis, all types
- **4521.0** Major surgery
- **5005.0** Fractures and dislocations, Head and face (includes: facial bones, jaw, nose, skull)
- **5010.0** Fracture and dislocation, Spinal column (includes: back, neck, vertebrae)

- **5015.0** Fractures and dislocations, Trunk area except spinal column (includes: clavicle, collarbone, pelvic scapula, rib)
- **5020.0** Fractures and dislocations, Leg (includes: femur, fibula, hip, knee, tibia)
- **5025.0** Fractures and dislocations, Ankle
- **5030.0** Fractures and dislocations, Foot and toes
- **5035.0** Fractures and dislocations, Arm (includes: elbow, humerus, radius, shoulder, ulna)
- **5040.0** Fractures and dislocations, Wrist
- **5045.0** Fractures and dislocations, Hand and fingers
- **5050.0** Fractures and dislocations, Fracture, other and unspecified
- **5105.0** Sprains and strains, Cervical spine, neck (includes: whiplash)
- **5110.0** Sprains and strains, Back
- **5115.0** Sprains and strains, Knee
- **5120.0** Sprains and strains, Ankle
- **5125.0** Sprains and strains, Wrist
- **5130.0** Sprains and strains, other and unspecified
- **5205.0** Lacerations and cuts, Head and neck area (excludes: face [5210.0])
- **5210.0** Lacerations and cuts, Facial area (includes: eye, ear, forehead, lip, nose)
- **5215.0** Lacerations and cuts, Trunk area (includes: perineum)
- **5220.0** Lacerations and cuts, Lower extremity (includes: ankle, foot)
- **5225.0** Lacerations and cuts, Upper extremity (includes: arm, fingers, hand, wrist)
- **5230.0** Lacerations and cuts, site unspecified
- **5305.0** Puncture wounds, Head, neck, and facial area
- **5310.0** Puncture wounds, Trunk area
- **5315.0** Puncture wounds, Lower extremity
- **5320.0** Puncture wounds, Upper extremity
- **5325.0** Puncture wounds, site unspecified (includes: Needlestick, NOS)
- **5405.0** Contusions, abrasions, and bruises, Head, neck, and face (excludes: Eye [5410.0])
- **5410.0** Contusions, abrasions, and bruises, Eye (includes: black eye, contusion, corneal abrasion)
- **5415.0** Contusions, abrasions, and bruises, Trunk area (includes: injury to scrotum)
- **5420.0** Contusions, abrasions, and bruises, Lower extremity
- **5425.0** Contusions, abrasions, and bruises, Upper extremity
- **5430.0** Contusions, abrasions, and bruises, site unspecified
- **5505.0** Injury, other, and unspecified type, Head, neck, and face (includes: post concussive syndrome, tooth fracture, tooth knocked out, traumatic brain injury; excludes: Loose tooth [no injury] 1500.0)
- **5510.0** Injury, other, and unspecified type, Eye
- **5515.0** Injury, other, and unspecified type, Back (includes: Tail bone)
- **5520.0** Injury, other, and unspecified type, Chest and abdomen (includes: Internal injuries)
- **5525.0** Injury, other, and unspecified type, Hip
- **5535.0** Injury, other, and unspecified type, Knee
- **5530.0** Injury, other, and unspecified type, Leg

- **5540.0** Injury, other, and unspecified type, Ankle
- **5545.0** Injury, other, and unspecified type, Foot and toe(s)
- **5550.0** Injury, other, and unspecified type, Shoulder
- **5555.0** Injury, other, and unspecified type, Arm
- **5560.0** Injury, other, and unspecified type, Elbow
- **5565.0** Injury, other, and unspecified type, Wrist
- **5570.0** Injury, other, and unspecified type, Hand and finger(s)
- **5575.0** Injury, multiple or unspecified (includes: post traumatic NOS headache)
- **5705.0** Burns, all degrees, Head, neck, and face (includes: eyes)
- **5710.0** Burns, all degrees, Trunk area
- **5715.0** Burns, all degrees, Extremities (includes: lower, upper)
- **5720.0** Burns, all degrees, Burn site unspecified
- **5760.0** Bites, animal, snake, human

*Probably painful Reason for Visit codes (SYMPTOMS)*

- **1220.3** Disturbances of sensation, Abnormal sensation (paresthesia) (includes: burning legs, burning, tingling sensation, needles and pins, prickly feeling, stinging)
- **1430.0** Breathing problems (includes: Hurts to breath)
- **1791.0** Postpartum problems (includes: bleeding, pain; excludes: postpartum examination, routine)
- **2675.5** Temporomandibular joint (TMJ) pain, temporomandibular joint (TMJ) syndrome

*Probably painful Reason for Visit codes (CONDITIONS)*

- **1840.0** Infections of skin, NOS (includes: draining wounds, infected blister, infected wound; excludes: athlete's foot [2025.0], wound drainage [as treatment])
  - **1840.1** Infection of skin of head or neck area
  - **1840.2** Infection of skin of arm, hand, or finger
  - **1840.3** Infection of skin of leg, foot, or toe
- **1240.0** Other symptoms referable to the nervous system (includes: brain lesion, confusion, cognitive decline, damaged nerves, neuralgia, neurovegetative, pinched nerve, postictal; excludes: nerve block 4560.0)
- **1825.0** Symptoms of sexual dysfunction (includes: dyspareunia, painful intercourse; excludes: psychological disorders)
- **2250.0** Anemia (includes: anemia, NOS, iron deficiency anemia, pernicious anemia, sickle cell anemia)
- **2450.0** Otitis media
- **2515.0** Ischemic heart disease (includes: angina pectoris, arteriosclerotic cardiovascular disease, arteriosclerotic heart disease, coronary, coronary heart disease, heart attack, ischemic cardiomyopathy, myocardial infarction)
- **2600.0** Upper respiratory infections except tonsillitis (includes: croup, laryngitis, pharyngitis, rhinitis, sinusitis; excludes: allergic rhinitis [2636.0], cold [1445.0], nose infection NOS [1405.3], sinus infection NOS [1410.2], throat infection NOS [1455.3])
- **2605.0** Tonsillitis
- **2650.0** Diseases of the esophagus, stomach, and duodenum (includes: Barrett's esophagus, duodenal ulcer, esophageal ulcer, esophagitis, gastritis, GERD, peptic ulcer, reflux, stomach ulcer; excludes: gastroenteritis [2005.0], stomach flu [1540.0])
- **2665.0** Diseases of the intestine and peritoneum (includes: abscess rectal, adhesions [abdominal or NOS; if states post-op, code 42050 also], Crohn's disease, diverticulitis, diverticulosis, fissure – rectal and anal, fistula – rectal and anal, ileitis, irritable bowel syndrome, proctitis, small bowel obstruction, spastic colitis, ulcerative colitis; excludes: intestinal virus [1540.0])
- **2675.1** Dental abscess
- **2675.2** Dental cavities
- **2705.0** Urinary tract disease except cystitis (includes: bladder stones, glomerulonephritis, glomerulonephrosis, kidney cyst, kidney stones, neurogenic bladder, pyelonephritis, renal failure, ureteral calculus, urethritis, urolithiasis; excludes: bladder infection [1665.2], kidney infection NOS [1670.2], passed stones [1680.0], urinary tract infection [1675.0])
- **2900.0** Arthritis (includes: osteoarthritis, rheumatism NOS, rheumatoid arthritis, septic)

- **2905.0** Nonarticular rheumatism (includes: bursitis, ganglion cyst, lumbago, myositis, polymyalgia rheumatica, radiculitis/radiculopathy, synovitis, tendinitis, tenosynovitis; excludes: rheumatism NOS [2900.0])
- **4520.0** Minor surgery
- **4540.0** Cast, splint – application, removal
- **5920.0** Adverse effects of environment (includes: air pollution, frostbite, hypothermia, noise pollution, sun damage, sun poisoning, too hot, water pollution)
- **5930.0** Complications of surgical or medical procedures and treatments (includes: artificial openings [ostomies, stoma], catheter, foreign body [accidentally left during surgery eg. Sponge, instrument], medical complication NOS, non-healing surgical wound, post-op fever, post-op hemorrhage [bleeding], post-op infection or inflammation, post-op [septicemia], shunt, tubes, wound dehiscence; excludes: postpartum conditions [1791.0 and 1810.2], complication of transplant organs [4565.1-4565.2])
- **5805.0** Motor vehicle accident, type of injury unspecified (includes: auto accident, car accident, motorcycle accident)
- **5810.0** Accident NOS (includes: fall, type or location of injury unspecified)
- **5815.0** Violence NOS (includes: abuse, beat up, in a fight, stabbing; excludes: violence against oneself [5818.0, 5820.0])
- **5818.0** Intentional self-mutilation (includes: self-abuse, tried to hurt self; excludes: suicide attempt [5820.0])
- **5820.0** Suicide attempt (includes: found in car with motor running, hanging oneself, slashed wrists, stabbed oneself).

## Data Supplement S2

### Codes by body system:

#### Musculoskeletal

- 1900 Neck symptoms
- 1905 Back symptoms
- 1910 Low back symptoms
- 1915 Hip symptoms
- 1920 Leg symptoms
- 1925 Knee symptoms
- 1930 Ankle symptoms
- 1940 Shoulder symptoms
- 1945 Arm symptoms
- 1950 Elbow symptoms
- 1955 Wrist symptoms
- 1960 Hand and finger symptoms (includes ring stuck on finger)
- 5005 Fractures and dislocations, Head and face
- 5020 Fractures and dislocations, Leg
- 5035 Fractures and dislocations, Arm
- 5045 Fractures and dislocations, Hand and Fingers
- 5050 Fractures and dislocations, other and unspecified
- 5105 Sprains and strains, Cervical spine, neck
- 5115 Sprains and strains, Knee
- 5120 Sprains and strains, Ankle
- 5405 Contusions, abrasions, and bruises, Head, neck, and face
- 5415 Contusions, abrasions, and bruises, Trunk area
- 5420 Contusions, abrasions, and bruises, Lower extremity
- 5425 Contusions, abrasions, and bruises, Upper extremity
- 5505 Injury, other and unspecified type, Head, neck, and face
- 5515 Injury, other and unspecified type, Back
- 5520 Injury, other and unspecified type, Chest and abdomen (includes internal injuries)
- 5530 Injury, other and unspecified type, Leg
- 5535 Injury, other and unspecified type, Knee
- 5540 Injury, other and unspecified type, Ankle
- 5545 Injury, other and unspecified type, Foot and toe(s)
- 5550 Injury, other and unspecified type, Shoulder
- 5555 Injury, other and unspecified type, Arm
- 5560 Injury, other and unspecified type, Elbow
- 5565 Injury, other and unspecified type, Wrist
- 5570 Injury, multiple or unspecified (includes post-traumatic NOS headache)

#### ENT

- 1355 Earache, or ear infection
- 1410 Sinus problems
- 1455 Symptoms referable to throat, raw throat

- 2010 Streptococcal infection

#### Abdominal

- 1545 Stomach and abdominal pain, cramps and spasms

#### Laceration

- 5205 Lacerations and cuts, Head and neck area
- 5210 Lacerations and cuts, Facial area
- 5215 Lacerations and cuts, Trunk area
- 5220 Lacerations and cuts, Lower extremity
- 5225 Lacerations and cuts, Upper extremity
- 5230 Laceration and cuts, site unspecified
- 5305 Puncture wounds, Head, neck and facial area
- 5315 Puncture wounds, Trunk area
- 5315 Puncture wounds, Lower extremity
- 5320 Puncture wounds, Upper extremity
- 5325 Puncture wound, site unspecified

#### Headache

- 1210 Headache, pain in head
- 2365 Migraine headache

#### General Pain

- 1800 Pain or soreness of breast
- 1055 Pain specified site not referable to a specific body system
- 1060 Pain and related symptoms, NEC
- 5430 Contusions, abrasions, and bruises, site unspecified
- 5575 Injury, multiple or unspecified
- 5130 Sprain or strain, other and unspecified
- 1970 Symptoms of unspecified joints
- 1965 Wrist symptoms

#### Chest

- 1050 Chest pain and related symptoms (not referable to a specific body system)

#### Eye

- 1320 Abnormal sensations of the eye
- 5510 Injury, other and unspecified type, Eye

#### Bite

- 5760 Bites, Animal, snake, human

#### Genitourinary

- 1650 Painful urination
- 1605 Symptoms referable to anus-rectum



- 1700 Symptoms of penis
- 1715 Symptoms of scrotum and testes
- 1745 Menstrual symptoms, other and unspecified
- 1765 Other vaginal symptoms
- 1775 Pelvic symptoms
- 1790 Problems of pregnancy

#### Burn

- 5705 Burns, all degrees, Head, neck, and face
- 5715 Burns, all degrees, Extremities
- 5720 Burn, site unspecified

#### Oral

- 1500 Symptoms of teeth and gums
- 1510 Symptoms referable to mouth

## Data Supplement S3

**Table S3.1.** Baseline characteristics comparison between pain-related and non-pain-related

pediatric ED visits.

|                                            | <b>All ED Visits</b>    |
|--------------------------------------------|-------------------------|
| <b>Age</b>                                 |                         |
| < 6 years                                  | 44.47% (40.20%, 48.83%) |
| 6-11 years                                 | 24.07% (22.83%, 25.35%) |
| 12-18 years                                | 31.46% (27.25%, 26.00%) |
| <b>Sex</b>                                 |                         |
| Female                                     | 48.47% (46.70%, 50.25%) |
| Male                                       | 51.53% (49.75%, 53.30%) |
| <b>Ethnicity</b>                           |                         |
| Hispanic or Latino                         | 25.47% (19.16%, 33.00%) |
| Not Hispanic or Latino                     | 74.53% (67.00%, 80.84%) |
| <b>Race</b>                                |                         |
| White                                      | 67.72% (61.60%, 73.29%) |
| Black                                      | 28.21% (22.82%, 34.32%) |
| Other                                      | 4.06% (3.10%, 5.32%)    |
| <b>Region</b>                              |                         |
| Northeast                                  | 13.27% (8.00%, 21.21%)  |
| Midwest                                    | 24.71% (17.22%, 34.12%) |
| South                                      | 45.30% (33.52%, 57.63%) |
| West                                       | 16.72% (9.84%, 26.97%)  |
| <b>Metropolitan Statistical Area (MSA)</b> |                         |
| MSA                                        | 86.96% (75.42%, 93.55%) |
| Non-MSA                                    | 13.04% (6.45%, 24.58%)  |
| <b>Arrived in EMS</b>                      |                         |
| Yes                                        | 4.95% (4.00%, 6.11%)    |
| No                                         | 90.52% (84.10%, 94.52%) |
| Unknown                                    | 4.01% (1.05%, 14.13%)   |
| Blank                                      | 0.52% (0.34%, 0.79%)    |
| <b>Triage (Immediacy)</b>                  |                         |
| Immediate                                  | 0.97% (0.29%, 3.22%)    |
| Emergent                                   | 7.23% (4.43%, 11.58%)   |
| Urgent                                     | 26.57% (21.79%, 31.97%) |
| Semi-urgent                                | 33.59% (28.20%, 39.44%) |
| Non-urgent                                 | 7.01% (4.15%, 11.60%)   |
| Unknown                                    | 16.30% (10.35%, 24.72%) |
| <b>Primary Payer</b>                       |                         |
| Private insurance                          | 22.60% (18.55%, 27.24%) |
| Medicare                                   | 0.36% (0.19%, 0.69%)    |

|                       |                         |
|-----------------------|-------------------------|
| Medicaid or CHIP      | 63.08% (56.22%, 69.46%) |
| Self-pay              | 4.47% (3.14%, 6.31%)    |
| Worker's compensation | 0.02% (0.01%, 0.07%)    |
| No charge/charity     | 0.08% (0.02%, 0.28%)    |
| Other                 | 1.37% (0.81%, 2.31%)    |
| Unknown               | 6.44% (2.48%, 15.70%)   |
| Blank                 | 1.58% (0.55%, 4.49%)    |

\*Results are presented as weighted proportions with its 95% confidence intervals.

## Data Supplement S4

**Table S4.1.** Sensitivity analysis - baseline characteristics comparison between definitely painful visits and non-painful visits.

|                             | <b>Definitely Painful Reason for Visit</b><br>54.27% (51.79% to 56.50%) | <b>Non-Pain Related Visits</b><br>45.85% (43.50% to 48.21%) |
|-----------------------------|-------------------------------------------------------------------------|-------------------------------------------------------------|
| <b>Age</b>                  |                                                                         |                                                             |
| < 6 years                   | 25.93% (22.08%, 30.20%)                                                 | 66.16% (61.47%, 70.55%)                                     |
| 6-11 years                  | 32.33% (29.68%, 35.10%)                                                 | 14.67% (12.71%, 16.88%)                                     |
| 12-18 years                 | 41.73% (36.47%, 47.19%)                                                 | 19.17% (15.87%, 22.96%)                                     |
| <b>Sex</b>                  |                                                                         |                                                             |
| Female                      | 49.21% (45.30%, 53.14%)                                                 | 47.95% (45.19%, 50.72%)                                     |
| Male                        | 50.79% (46.86%, 54.70%)                                                 | 52.05% (49.28%, 54.81%)                                     |
| <b>Ethnicity</b>            |                                                                         |                                                             |
| Hispanic or Latino          | 25.46% (18.06%, 34.61%)                                                 | 25.93% (19.95%, 32.96%)                                     |
| Not Hispanic or Latino      | 74.54% (65.39%, 81.94%)                                                 | 74.07% (67.04%, 80.05%)                                     |
| <b>Race</b>                 |                                                                         |                                                             |
| White                       | 71.09% (64.41%, 76.96%)                                                 | 70.86% (64.15%, 76.77%)                                     |
| Black                       | 26.50% (20.82%, 33.09%)                                                 | 26.57% (20.89%, 33.15%)                                     |
| Other                       | 2.41% (1.67%, 3.45%)                                                    | 2.56% (1.72%, 3.82%)                                        |
| <b>Region</b>               |                                                                         |                                                             |
| Northeast                   | 12.66% (7.67%, 20.17%)                                                  | 13.69% (8.00%, 22.46%)                                      |
| Midwest                     | 24.89% (17.78%, 33.68%)                                                 | 24.63% (16.16%, 35.66%)                                     |
| South                       | 47.05% (35.24%, 59.21%)                                                 | 43.15% (31.00%, 56.18%)                                     |
| West                        | 15.40% (9.19%, 24.66%)                                                  | 18.53% (10.46%, 30.69%)                                     |
| <b>Arrived in EMS</b>       |                                                                         |                                                             |
| Yes                         | 3.95% (2.84%, 5.46%)                                                    | 5.67% (4.14%, 7.72%)                                        |
| No                          | 91.69% (85.19%, 95.49%)                                                 | 89.76% (83.06%, 94.00%)                                     |
| Blank/Unknown               | 4.36% (1.34%, 13.26%)                                                   | 4.57% (1.34%, 14.48%)                                       |
| <b>Triage (Immediacy)</b>   |                                                                         |                                                             |
| No triage for visit but ESA | 0.83% (0.34%, 2.03%)                                                    | 1.04% (0.42%, 2.54%)                                        |
| Immediate                   | 1.04% (0.28%, 3.85%)                                                    | 0.75% (0.27%, 2.06%)                                        |
| Emergent                    | 5.49% (3.36%, 8.84%)                                                    | 8.77% (5.19%, 14.44%)                                       |
| Urgent                      | 28.78% (22.51%, 35.99%)                                                 | 23.87% (19.65%, 28.66%)                                     |
| Semi-urgent                 | 35.32% (28.88%, 42.33%)                                                 | 31.73% (27.04%, 36.82%)                                     |
| Non-urgent                  | 4.63% (2.27%, 9.21%)                                                    | 10.12% (6.66%, 15.08%)                                      |
| Blank/Unknown               | 20.09% (13.04%, 29.66%)                                                 | 19.66% (13.37%, 27.96%)                                     |
| <b>Primary Payer</b>        |                                                                         |                                                             |
| Private insurance           | 25.90% (21.61%, 30.71%)                                                 | 18.29% (14.21%, 23.22%)                                     |
| Medicare                    | 0.37% (0.18%, 0.77%) <sup>†</sup>                                       | 0.38% (0.16%, 0.88%) <sup>†</sup>                           |
| Medicaid or CHIP            | 61.24% (55.39%, 66.79%)                                                 | 65.80% (56.93%, 73.69%)                                     |

|                       |                                   |                                   |
|-----------------------|-----------------------------------|-----------------------------------|
| Self pay              | 4.57% (3.17%, 6.56%)              | 4.45% (2.92%, 6.72%)              |
| Worker's compensation | 0.03% (0.01%, 0.14%) <sup>†</sup> | 0.01% (0.00%, 0.06%) <sup>†</sup> |
| No charge/charity     | 0.06% (0.01%, 0.43%) <sup>†</sup> | 0.12% (0.03%, 0.54%) <sup>†</sup> |
| Other                 | 1.12% (0.60%, 2.07%)              | 1.38% (0.72%, 2.65%)              |
| Blank/Unknown         | 6.71% (3.22%, 13.42%)             | 9.58% (4.03%, 21.11%)             |

\*Results are presented as weighted proportions with its 95% confidence intervals.

<sup>†</sup>This represented cell sizes smaller than 30, which are considered not reliable for meaningful analysis by the NHAMCS guidelines.

## Data Supplement S5

**Table S5.1.** Body system involvement for all pain-related ED visits stratified by the presence of injury/trauma.

| Body system             | Pain-related ED visits with injury/trauma* | Pain-related ED visits without injury/trauma* |
|-------------------------|--------------------------------------------|-----------------------------------------------|
| Musculoskeletal         | 69.5% (63.7%, 74.8%)                       | 7.1% (4.5%, 11.1%)                            |
| Skin Laceration         | 14.7% (11.4%, 18.8%)                       | 0.0% (0.0%, 0.0%)                             |
| General Pain            | 3.7% (2.4%, 5.5%)                          | 6.2% (4.0%, 9.5%)                             |
| Headache                | 3.2% (2.0%, 5.2%)                          | 8.8% (6.6%, 11.8%)                            |
| Eye                     | 1.6% (0.8%, 3.2%)                          | 0.8% (0.3%, 2.3%)                             |
| Bite                    | 2.3% (1.4%, 3.8%)                          | 0.0% (0.0%, 0.0%)                             |
| Burn                    | 1.9% (0.9%, 4.1%)                          | 0.0% (0.0%, 0.0%)                             |
| Abdominal               | 0.6% (0.3%, 1.4%)                          | 32.0% (25.5%, 39.3%)                          |
| Ear/Nose/Throat         | 0.7% (0.3%, 1.7%)                          | 31.0% (23.1%, 40.2%)                          |
| Genital-urinary/Dysuria | 0.2% (0.1%, 0.9%)                          | 5.7% (4.2%, 7.7%)                             |
| Chest                   | 0.9% (0.3%, 2.4%)                          | 6.9% (4.8%, 10.0%)                            |
| Oral                    | 0.6% (0.2%, 2.1%)                          | 1.3% (0.5%, 2.3%)                             |

\*Results are presented as weighted proportions with its 95% confidence intervals.

**Table S5.2.** Body system involvement for pain-related ED visits with a painful chief complaint.

| Body system             | Proportion* (95% CI) |
|-------------------------|----------------------|
| Musculoskeletal         | 39.9% (34.6%, 45.6%) |
| Abdominal               | 16.0% (11.9%, 21.1%) |
| Ear/Nose/Throat         | 14.8% (12.1%, 18.0%) |
| Skin Laceration         | 7.6% (5.6%, 10.2%)   |
| Headache                | 5.8% (4.5%, 7.3%)    |
| General Pain            | 4.7% (3.3%, 6.9%)    |
| Chest                   | 3.8% (2.6%, 5.6%)    |
| Genital-urinary/Dysuria | 2.8% (2.1%, 3.8%)    |
| Eye                     | 1.3% (0.8%, 2.1%)    |
| Bite                    | 1.2% (0.7%, 2.0%)    |
| Burn                    | 1.0% (0.4%, 2.2%)    |
| Oral                    | 0.9% (0.4%, 1.9%)    |

\*Results are presented as weighted proportions with its 95% confidence intervals.
